# Supplementary material
Source: PubMed Central journal article supplement (PMC6317479)
Supplement: 139097_0_supp_160804_pb0s5v.pdf [file 139097_0_supp_160804_pb0s5v.pdf]

## Supplemental Figure 1

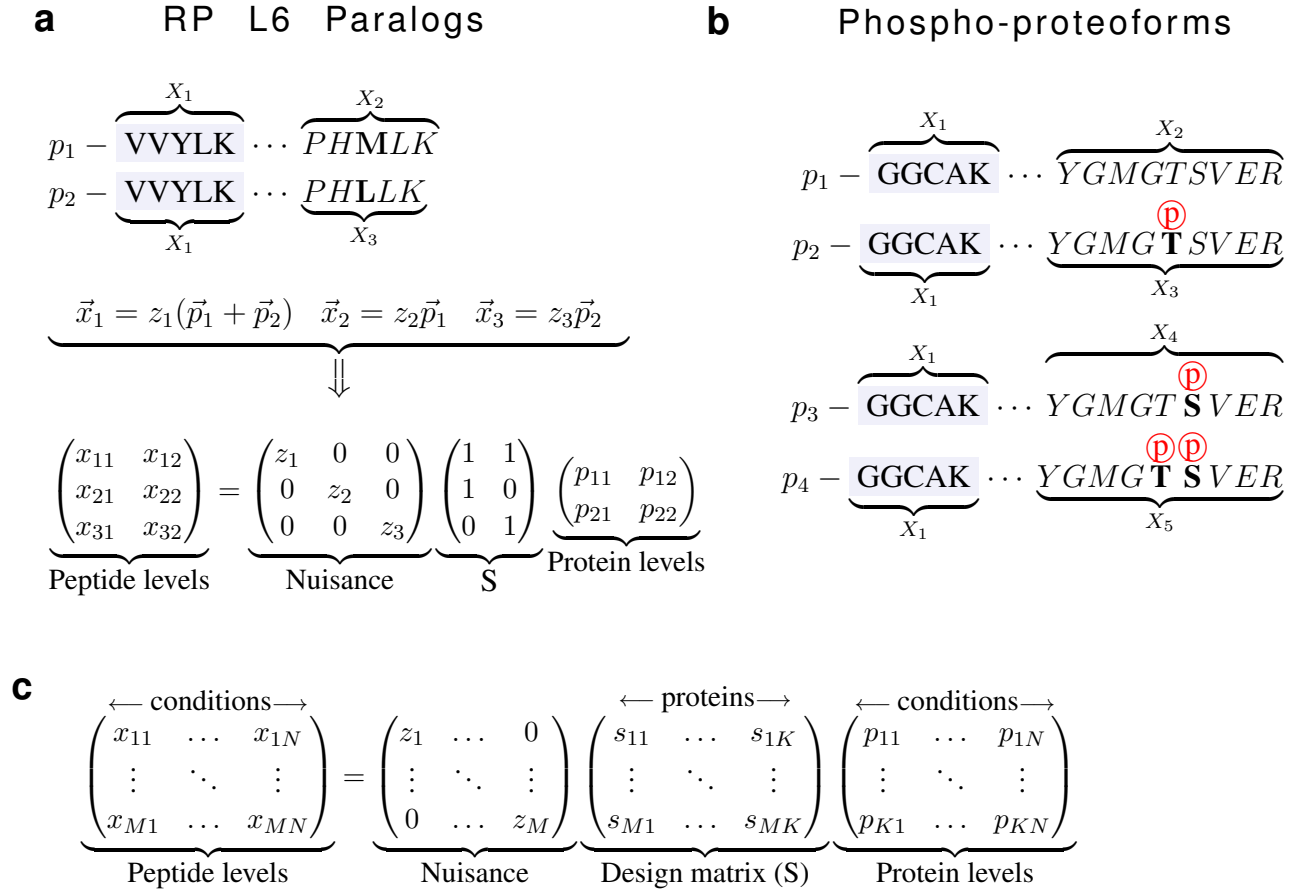

**Figure S1** | Model for inferring stoichiometries among proteoforms and paralogous proteins independently from peptide-specific biases. **(a)** One shared ( $X_1$ ) and two unique ( $X_2$  and  $X_3$ ) peptides from the two paralogs of ribosomal proteins L6 illustrate the simplest case of *HIquant*. *HIquant* models the peptide levels measured across two conditions ( $\vec{x}$ ) as a supposition of the protein levels ( $\vec{p}$ ), scaled by unknown peptide-specific nuisances ( $z$ ). These coupled equations can be written in a matrix form whose solution infers the  $P_1/P_2$  stoichiometry independently from the nuisances ( $z$ ). **(b)** The shared and unique peptides of proteoforms (as illustrated by PDHA1 phospho-proteoforms) can be modeled as in panel (a); **(c)** The matrix system from (a) generalizes to  $K$  proteoforms (and homologous proteins) with  $M$  peptides quantified across  $N$  conditions. In many, albeit not all, cases an optimal and unique solution can be found, even in the absence of unique peptides. See Supplemental Information for details.
